# Supplementary material for: Hydrolysis of crystalline cellulose to glucose in an autoclave containing both gaseous and liquid water
Source: Royal Society of Chemistry journal article supplement (doi:10.1039/c4ra02396j), 2014-01-01
Supplement: c4ra02396j1.pdf [file c4ra02396j1.pdf]

# Hydrolysis of crystalline cellulose to glucose in an autoclave containing both gaseous and liquid water

*Takashi Harada* \*, *Yuji Tokai*, *Akira Kimura*, *Shigeru Ikeda*, *Michio Matsumura*

Research Center for Solar Energy Chemistry, Osaka University, 1-3 Machikaneyama,

Toyonaka 560-8531, Japan

\* Corresponding Author: Takashi HARADA

Tel: +81-6-6850-6697; fax: +81-6-6850-6699

E-mail address: [harada@chem.es.osaka-u.ac.jp](mailto:harada@chem.es.osaka-u.ac.jp)

## Supporting Information

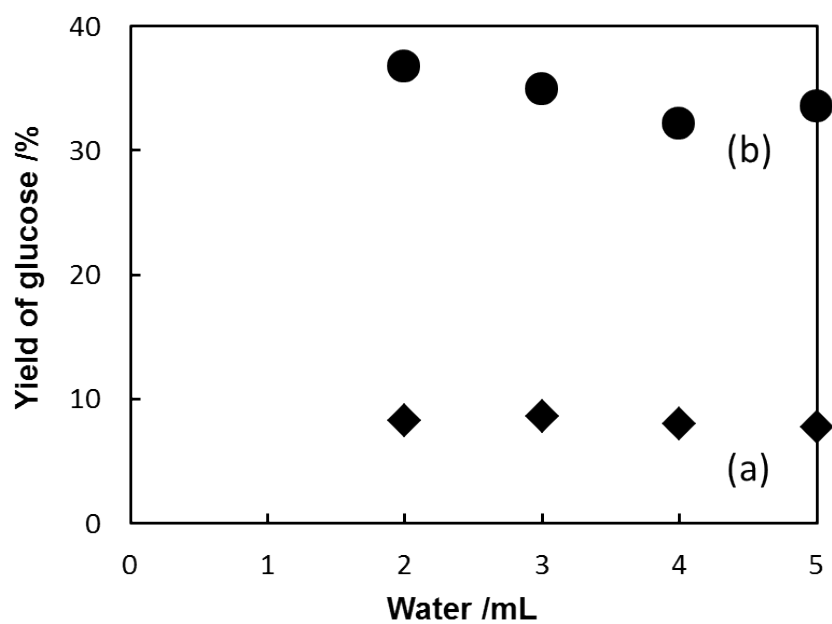

Fig. S1 Yield of glucose produced by hydrolysis of amorphous cellulose as a function of water added to the autoclave (100 mL). The hydrolysis was carried out at (a) 160 °C and (b) 190 °C for 5 h. Cellulose: 324 mg, water: 2 mL.

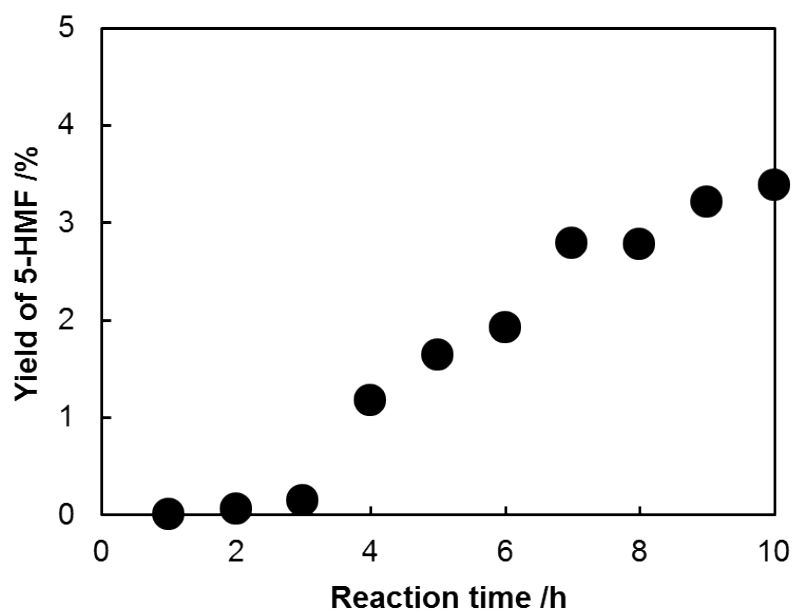

Fig. S2 Yield of 5-HMF produced by hydrolysis of crystalline cellulose at 190 °C.  
Cellulose: 324 mg, water: 2 mL.

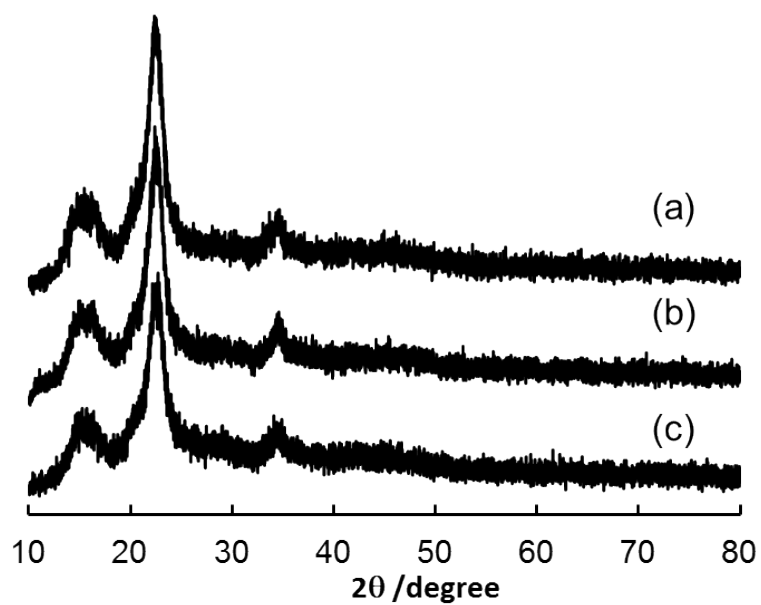

Fig. S3 XRD patterns of (a) reagent crystalline cellulose and residual cellulose after hydrolysis reaction at 190 °C for (b) 4 h and (c) 8 h.
